# Supplementary material for: Fabrication and Characterization of a Self-Powered n-Bi2Se3/p-Si Nanowire Bulk Heterojunction Broadband Photodetector
Source: MDPI journal article supplement (doi:10.3390/nano12111824), 2022-05-26
Supplement: s1 [file s1]

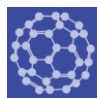

## Supplementary Material

# Fabrication and Characterization of a Self-Powered n-Bi<sub>2</sub>Se<sub>3</sub>/p-Si Nanowire Bulk Heterojunction Broadband Photodetector

Xuan Wang <sup>1</sup>, Yehua Tang <sup>1</sup>, Wanping Wang <sup>1</sup>, Hao Zhao <sup>2</sup>, Yanling Song <sup>1</sup>, Chaoyang Kang <sup>1,\*</sup> and KeFan Wang <sup>1,\*</sup>

<sup>1</sup> Henan Province Key Laboratory of Photovoltaic Materials, Henan University, Kaifeng 475004, China; 104754190988@henu.edu.cn (X.W.); 80020012@vip.henu.edu.cn (Y.T.); 104754191019@henu.edu.cn (W.W.); songyl@163.com (Y.S.)

<sup>2</sup> School of Physics and Electronics, Henan University, Kaifeng 475004, China; 18211973341@163.com

\* Correspondence: kangcy@vip.henu.edu.cn (C.K.); kfwang@henu.edu.cn (K.-F.W.)

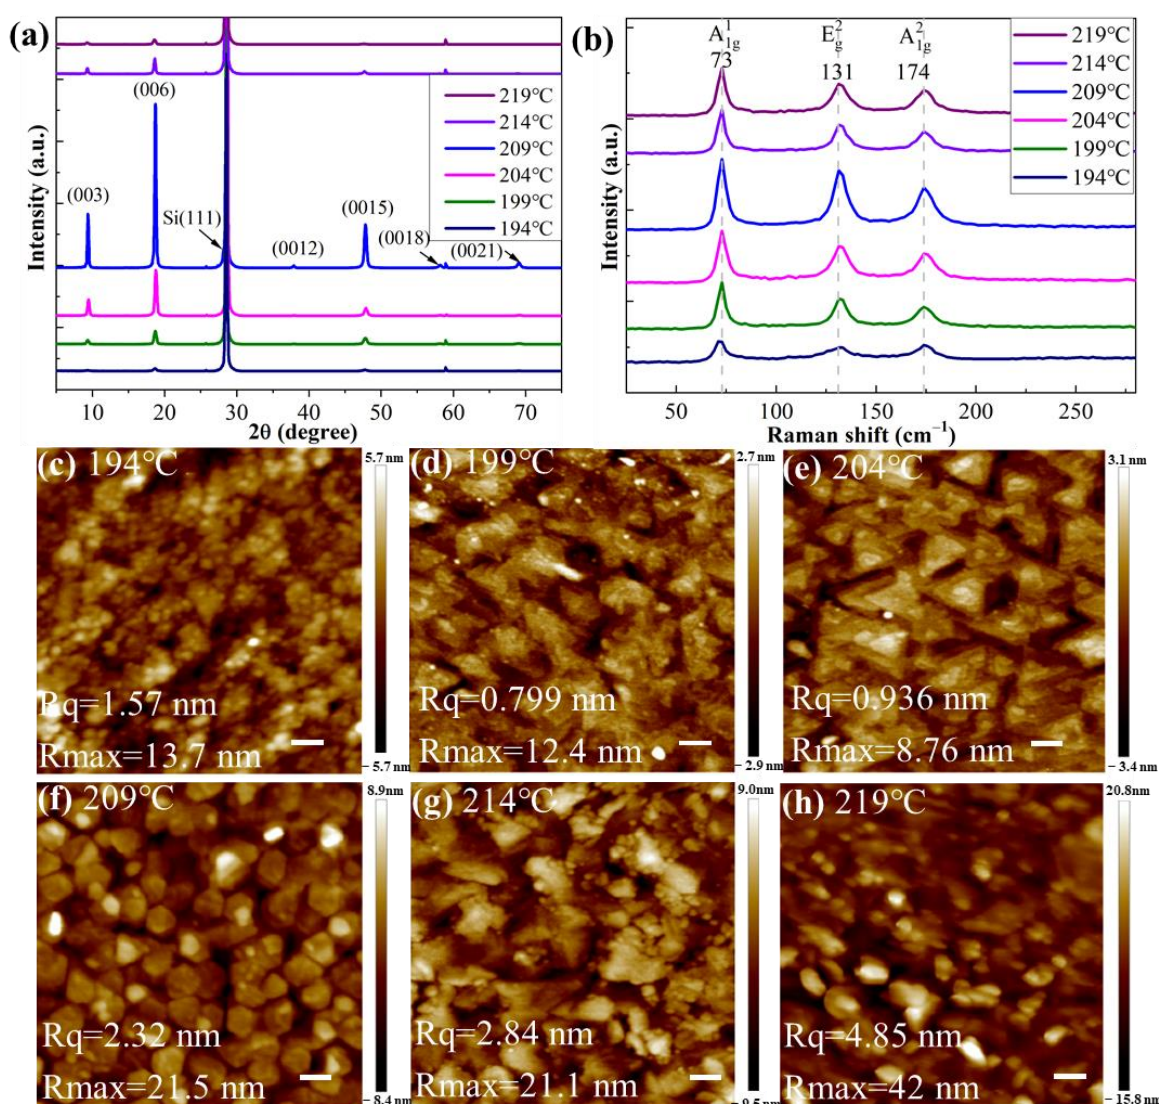

**Figure S1.** Characterization of Bi<sub>2</sub>Se<sub>3</sub> films grown at the different Se cell temperatures (194°C~219°C) and at the same Bi cell temperature of 750°C and the growth temperature of 320°C: (a) XRD; (b) Raman; (c)–(h) AFM of sample surface. Scale bars in (c)–(h) are all 100 nm.

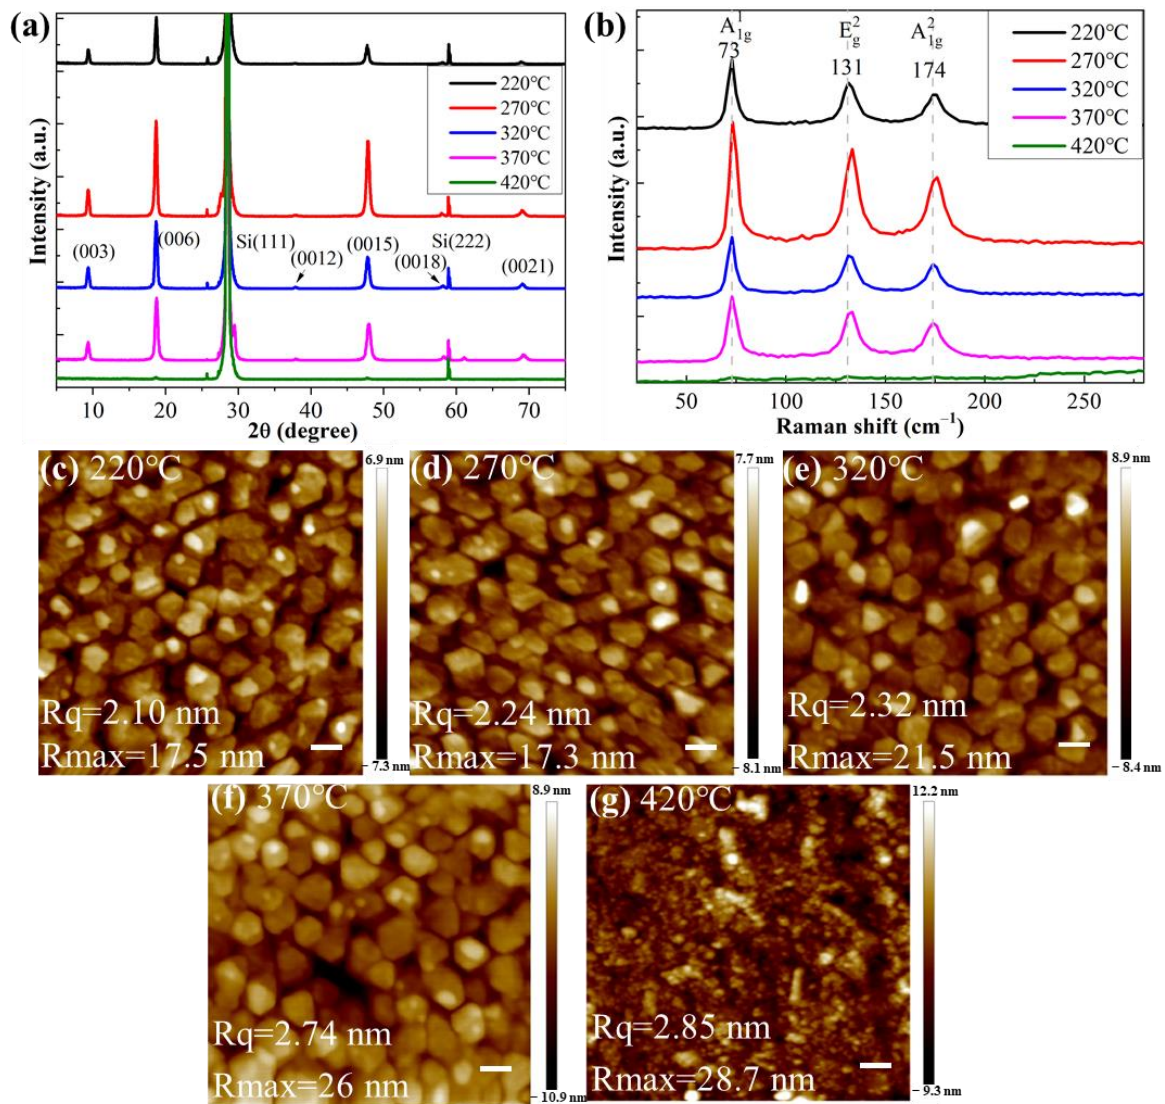

**Figure S2.** Characterization of Bi<sub>2</sub>Se<sub>3</sub> films grown at the different growth temperatures (220°C~420 °C) and at the same Bi cell temperature of 750°C and Se cell temperature of 209°C: (a) XRD; (b) Raman; (c)-(g) AFM of sample surface. Scale bars in (c)-(g) are all 100 nm.



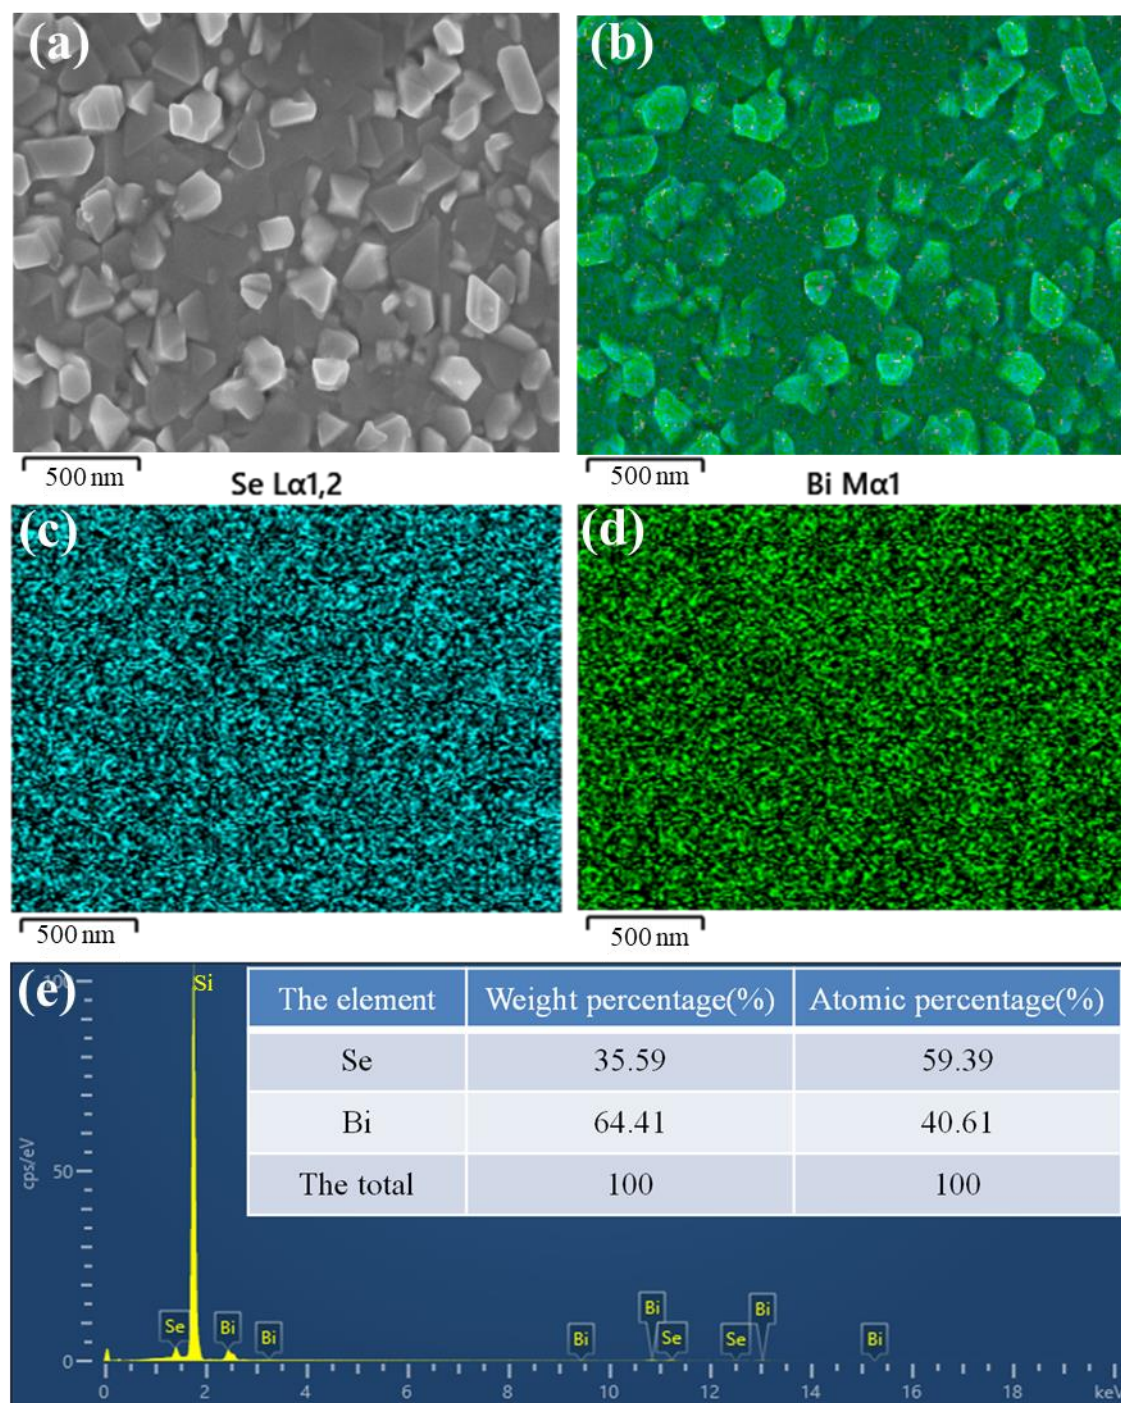

**Figure S3.** (a) Surface SEM image of Bi<sub>2</sub>Se<sub>3</sub> thin films; (b) EDS stratification diagram of Bi<sub>2</sub>Se<sub>3</sub> thin film; (c) Se atomic distribution map; (d) Bi atomic distribution map; (e) EDS spectrum of Bi<sub>2</sub>Se<sub>3</sub> thin film.

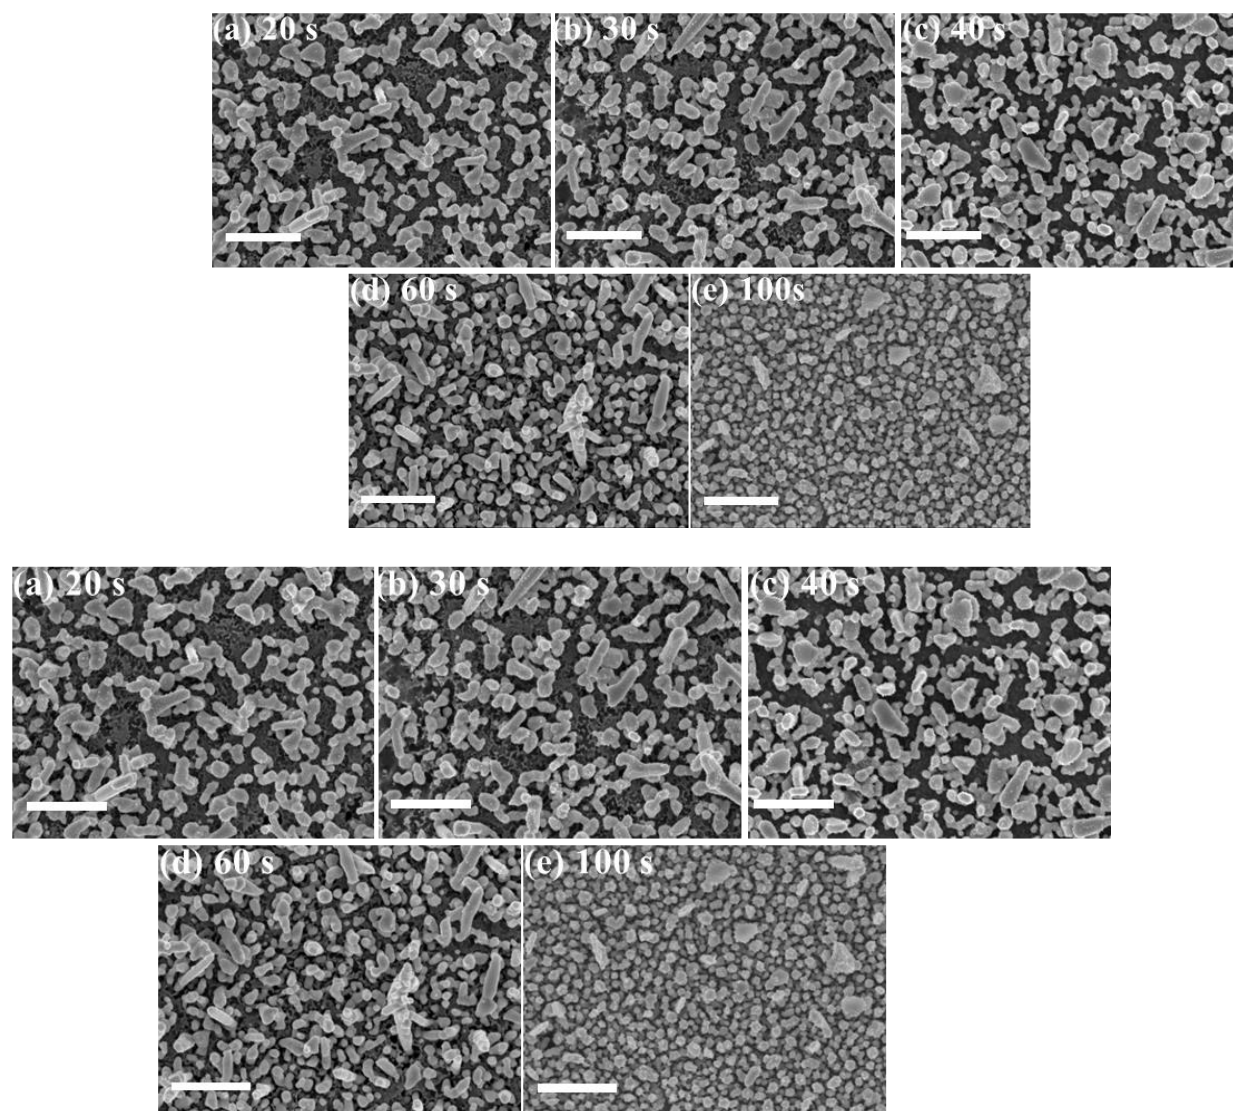

**Figure S4.** Surface SEM images of Ag NPs with different deposition times: (a) 20 s; (b) 30 s; (c) 40 s; (d) 60 s; (e) 100 s. Scale bars in (a)-(e) are all 1  $\mu\text{m}$ .

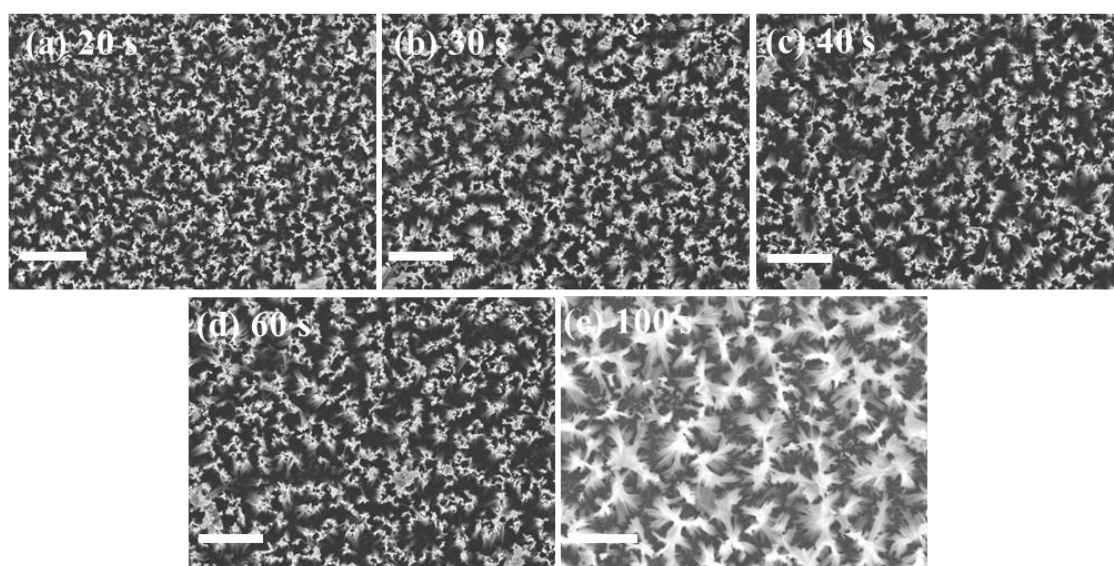

**Figure S5.** Surface SEM images of the Si NWs with the same etching time of 10 min and the different deposition times of Ag NPs: (a) 20 s; (b) 30 s; (c) 40 s; (d) 60 s; (e) 100 s. Scale bars in (a)–(e) are all 2  $\mu\text{m}$ .

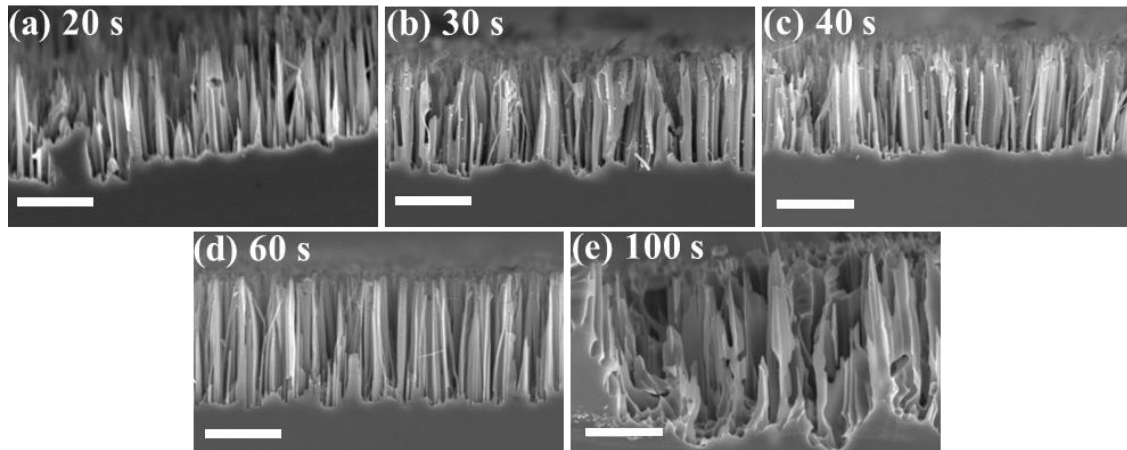

**Figure S6.** Cross-sections SEM images of Si NPs with the same etching time of 10 min and the different deposition times of Ag NPs: (a) 20 s; (b) 30 s; (c) 40 s; (d) 60 s; (e) 100 s. Scale bars in (a)–(e) are all 2  $\mu\text{m}$ .

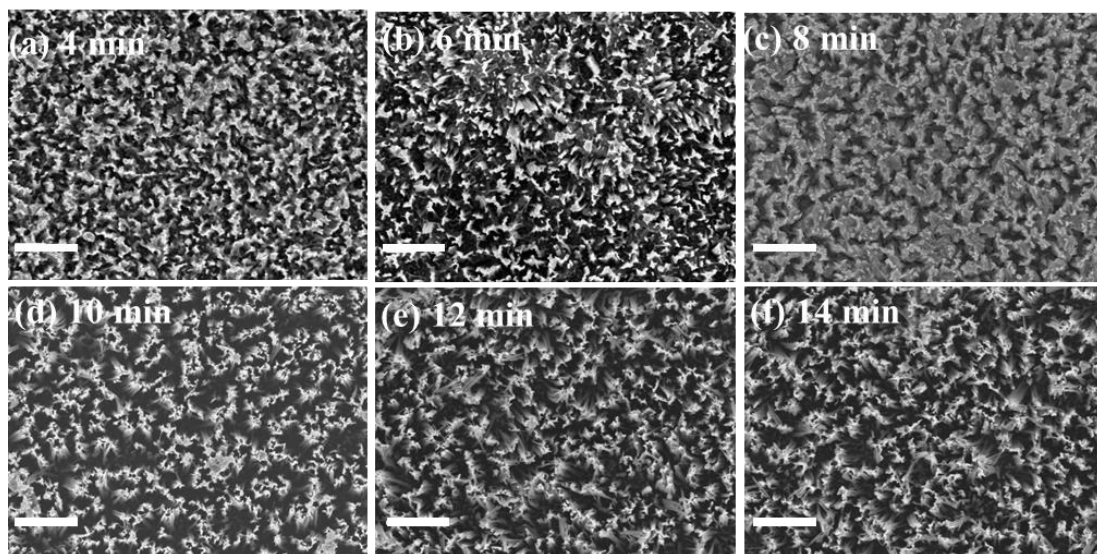

**Figure S7.** Surface SEM images of Si NWs with the same Ag NPs deposition time of 60 s and the different etching time: (a) 4 min; (b) 6 min; (c) 8 min; (d) 10 min; (e) 12 min; (f) 14 min. Scale bars in (a)–(f) are all 2  $\mu\text{m}$ .

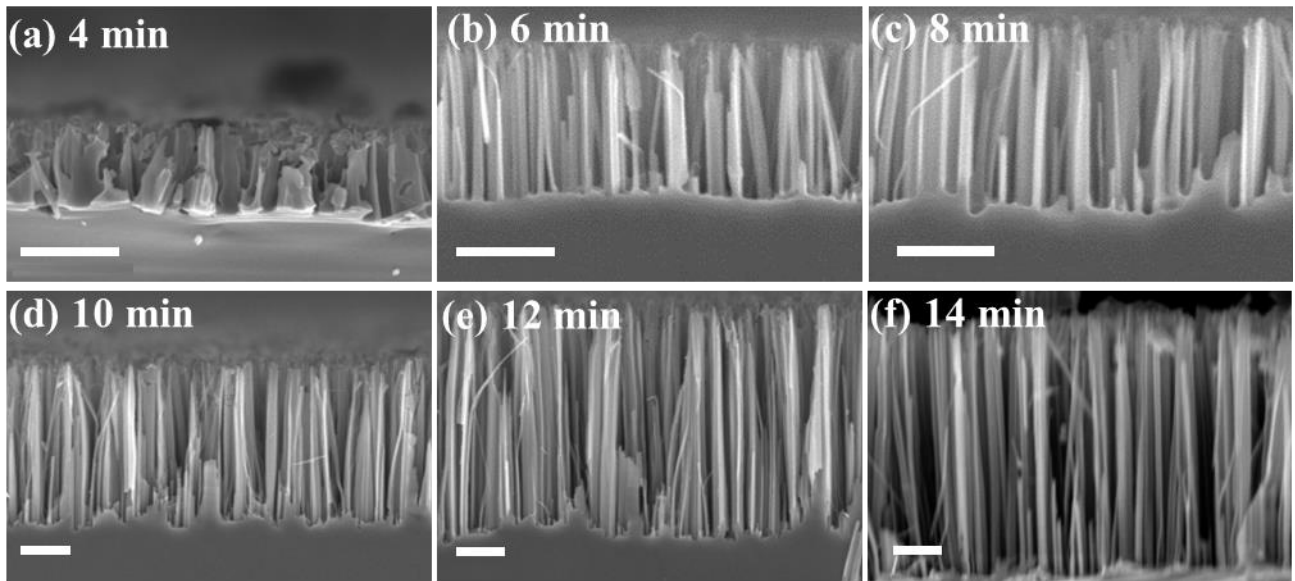

**Figure S8.** Cross-section SEM images of Si NWs with the same Ag NPs deposition time of 60 s and the different etching time: (a) 4 min; (b) 6 min; (c) 8 min; (d) 10 min; (e) 12 min; (f) 14 min. Scale bars in (a)–(f) are all 1  $\mu\text{m}$ .

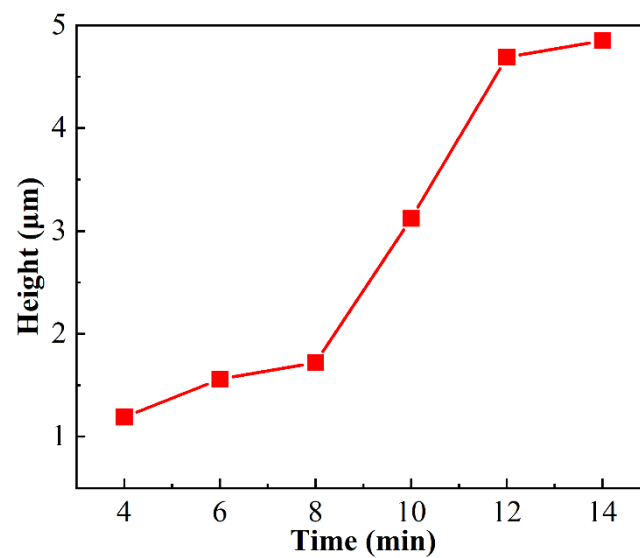

**Figure S9.** The height of Si NWs as a function of the etching time.



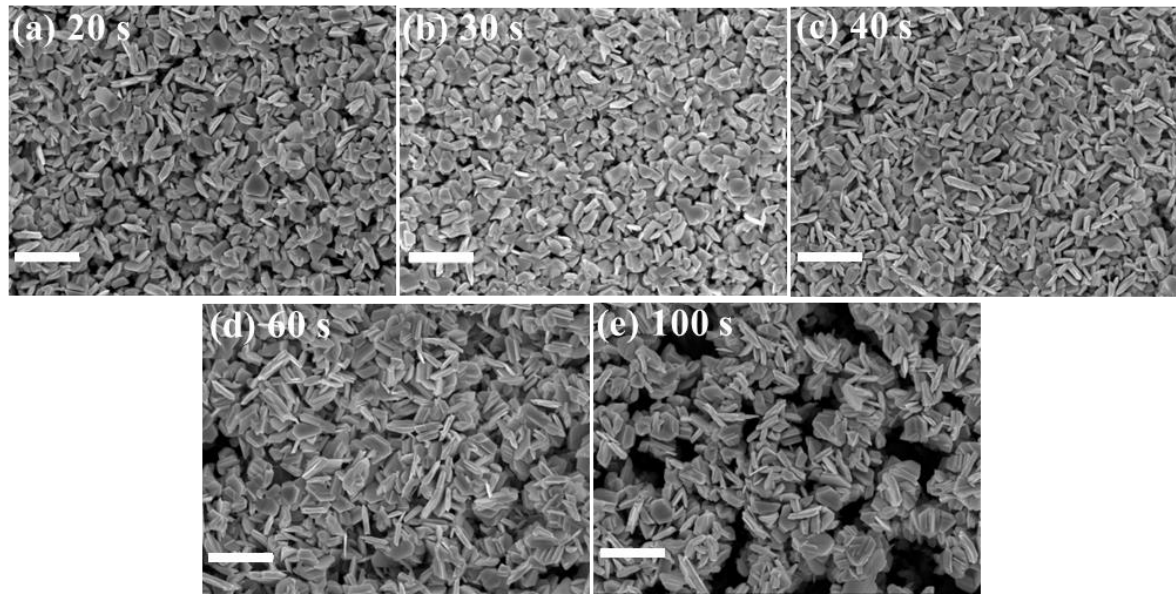

**Figure S10.** Surface SEM images of  $\text{Bi}_2\text{Se}_3/\text{Si}$  NWs samples with the same etch time of 10 min and the different deposition time of Ag NPs: (a) 20 s; (b) 30 s; (c) 40 s; (d) 60 s; (e) 100 s. Scale bars in (a)–(e) are all 1  $\mu\text{m}$ .

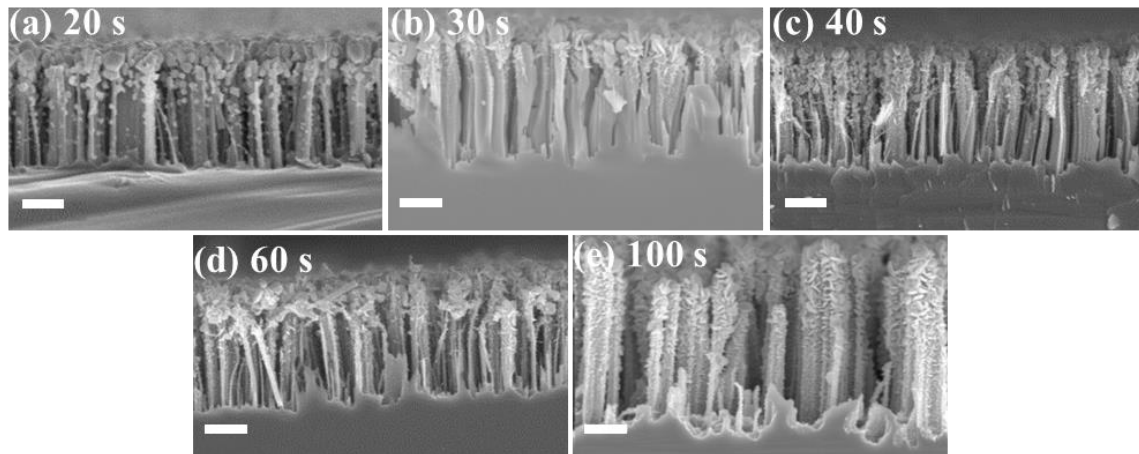

**Figure S11.** Cross-section SEM images of  $\text{Bi}_2\text{Se}_3/\text{Si}$  NWs samples with the same etch time of 10 min and the different deposition times of Ag NPs: (a) 20 s; (b) 30 s; (c) 40 s; (d) 60 s; (e) 100 s. Scale bars in (a)–(e) are all 1  $\mu\text{m}$ .

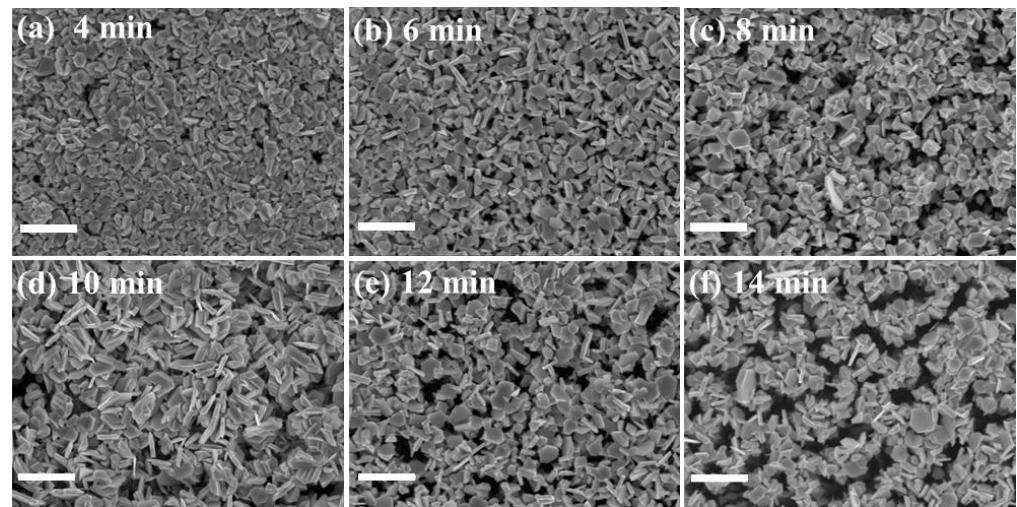

**Figure S12.** Surface SEM images of Bi<sub>2</sub>Se<sub>3</sub>/Si NWs samples with the same deposition times (60 s) of Ag NPs and the different etching times: (a) 4 min; (b) 6 min; (c) 8 min; (d) 10 min; (e) 12 min; (f) 14 min. Scale bars in (a)–(f) are all 1 μm.

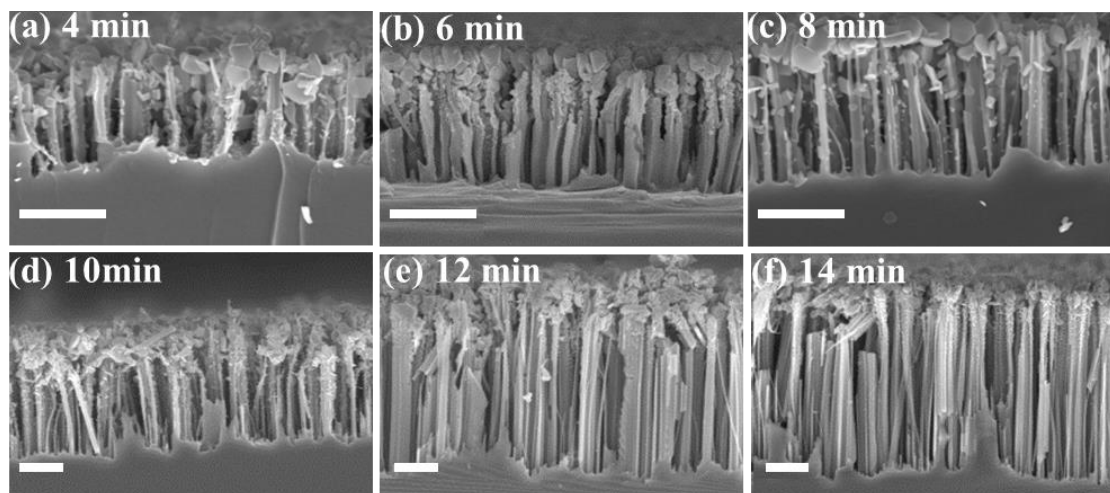

**Figure S13.** Cross-section SEM images of Bi<sub>2</sub>Se<sub>3</sub>/Si NWs samples with the same deposition times (60s) of Ag NPs and the different etching times: (a) 4 min; (b) 6 min; (c) 8 min; (d) 10 min; (e) 12 min; (f) 14 min. Scale bars in (a)–(f) are all 1 μm.



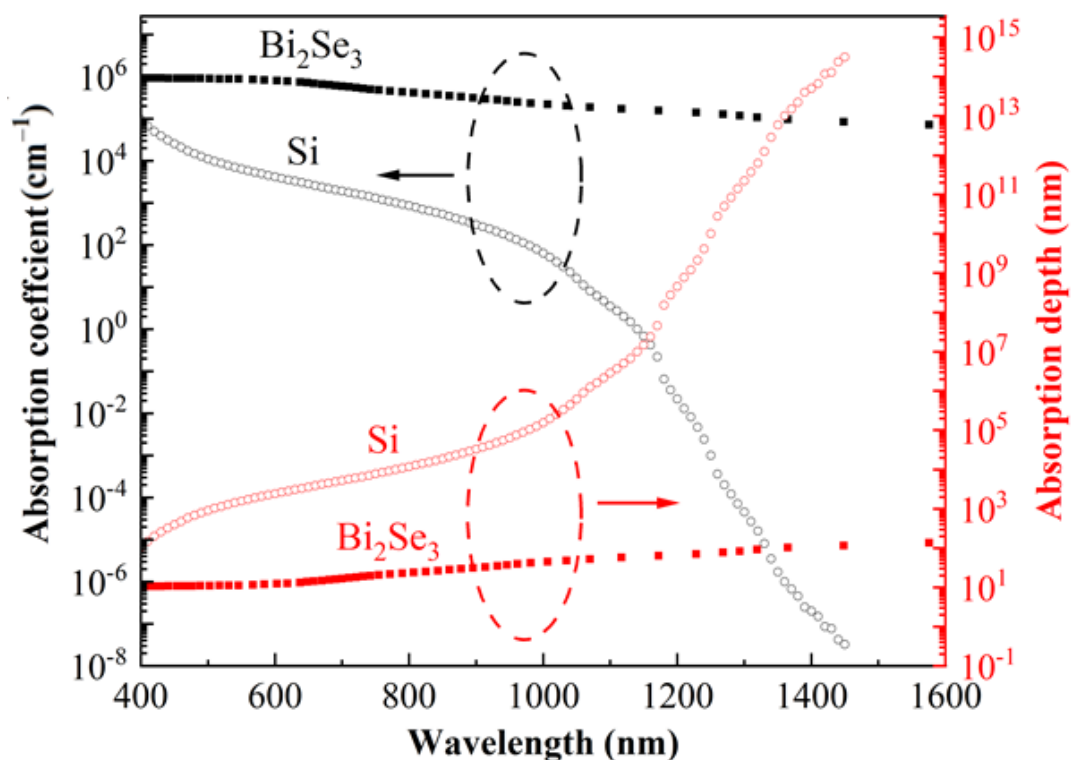

Figure S14. Absorption coefficient and absorption depth of silicon and Bi<sub>2</sub>Se<sub>3</sub>[24, 25].

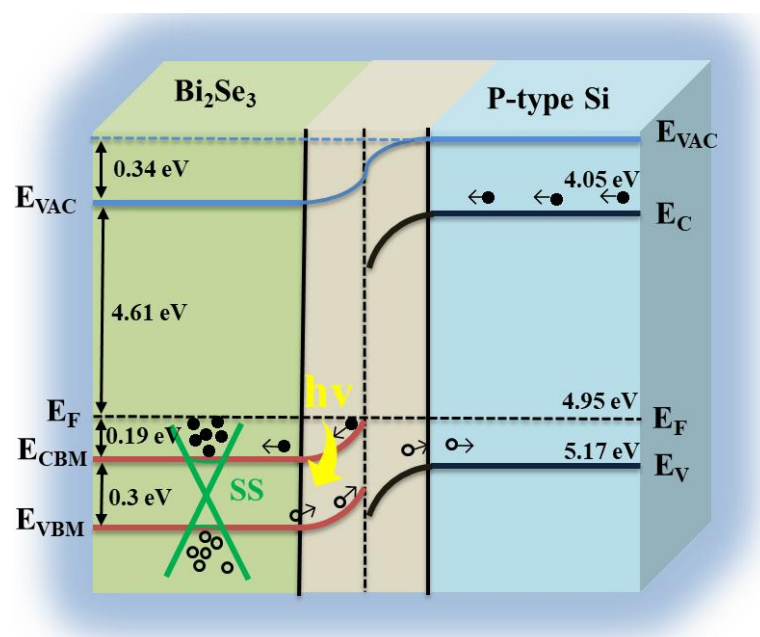

Figure S15. Energy-band diagrams for a n-Bi<sub>2</sub>Se<sub>3</sub>/p-Si NWs heterostructure photodetector. Evac is the vacuum energy level. E<sub>CBM</sub> and E<sub>VBM</sub> are the conduction-band bottom and valence-band top of the Bi<sub>2</sub>Se<sub>3</sub> film, respectively. E<sub>c</sub> and E<sub>v</sub> denote the conduction-band bottom and valence-band top of Si, respectively, and E<sub>F</sub> is the Fermi level. The solid and hollow spots represent photogenerated electrons and holes, respectively.

Table S1. Performance comparison of our Bi<sub>2</sub>Se<sub>3</sub>/Si NWs photodetector with previous Bi<sub>2</sub>Se<sub>3</sub>/Si photodetectors.

| Sample | Wavelength (nm) | Responsivity | D* (Jones) | I <sub>p</sub> /I <sub>d</sub> | τ <sub>r</sub> /τ <sub>f</sub> (ms) | References |
|--------|-----------------|--------------|------------|--------------------------------|-------------------------------------|------------|
|--------|-----------------|--------------|------------|--------------------------------|-------------------------------------|------------|

|                                                                 |            |                                                                           |                                                                                                  |                                               |                                            |           |
|-----------------------------------------------------------------|------------|---------------------------------------------------------------------------|--------------------------------------------------------------------------------------------------|-----------------------------------------------|--------------------------------------------|-----------|
| Bi <sub>2</sub> Se <sub>3</sub> /p-Si NWs                       | 390-1700   | 14.17 mA/W (960 nm)<br>84.3 mA/W (390 nm)<br>7 mA/W (1.7 µm)              | 1.79×10 <sup>9</sup> (960 nm)<br>2.38×10 <sup>10</sup> (390 nm)<br>8.28×10 <sup>8</sup> (1.7 µm) | 61.7 (980 nm)                                 | 3/1 (980 nm)                               | This work |
| Bi <sub>2</sub> Se <sub>3</sub> Nanoflakes/p-Si NWs             | 300-1000   | 938.4 A/W (900 nm)                                                        | 2.30×10 <sup>13</sup> (900 nm)                                                                   | 2.5 (900 nm)                                  | 41/79 (900 nm)                             | [21]      |
| Vertical Cu-dope Bi <sub>2</sub> Se <sub>3</sub> nanoplate/p-Si | 400-1200   | 168.9 mA/W (900 nm)                                                       | 1.85×10 <sup>11</sup> (900 nm)                                                                   | 113 (900 nm)                                  | 4/4 (900 nm)                               | [19]      |
| Bi <sub>2</sub> Se <sub>3</sub> /pyramidal n-Si                 | 635-2700   | 3.06×10 <sup>-5</sup> mA/W (1.5 µm)<br>1.8×10 <sup>-5</sup> mA/W (2.7 µm) | 1.37×10 <sup>5</sup> (1.5 µm)<br>1.53×10 <sup>6</sup> (2.7 µm)                                   | 1.01×10 <sup>4</sup> (1.5 µm)<br>1.42 (2.7µm) | 0.52/0.44 (1.55 µm)<br>0.585/0.535 (2.7µm) | [17]      |
| Bi <sub>2</sub> Se <sub>3</sub> NWs/n-Si                        | 380-1310   | 924.2 A/W (808 nm)                                                        | 2.38×10 <sup>12</sup> (808 nm)                                                                   | 10 (808 nm)                                   | 45/47 (808 nm)                             | [18]      |
| Bi <sub>2</sub> Se <sub>3</sub> /n-Si                           | 350-1100   | 24.28 A/W (808 nm)                                                        | 4.39×10 <sup>12</sup> (808 nm)                                                                   | 1.55×10 <sup>5</sup> (808 nm)                 | 2.5/5.5 ×10 <sup>-3</sup> (808 nm)         | [16]      |
| MoS <sub>2</sub> /Si                                            | 450-1050   | 300 mA/W                                                                  | 10 <sup>23</sup> (808 nm)                                                                        | --                                            | 3/40 ×10 <sup>-3</sup> (808 nm)            | [51]      |
| Reduced Graphene Oxide (RGO)/Si NWs                             | 532-10,600 | 9 mA/W (10.6 µm)                                                          | --                                                                                               | --                                            | 70 (10.6 µm)                               | [52]      |
